# Supplementary material
Source: Springer Nature journal article supplement (https://www.springermedizin.de/resource/supplementary/12985_2010_925_MOESM5_ESM.pdf/9608752)
Supplement: MOESM5 [file 9608752]

(a)

WA : 1 ATAAATGCCTCTAGTAGGATTCGAACACGGCATTTTTCAATTTATTTTACCTGAATTTTCGGCCACGTGCCATAAAAATTTTATCTTTTATTTCTCGTGTIT  
SA : 1 ATAAATGCCTCTAGTAGGATTCGAACACGGCATTTTTCAAAATTTATTTTACCTGAATTTTCGGCCACGTGCCATAAAAATTTTGTCTTTTATTTCTCGTGTIT  
\* \* \* \* \*

WA : 101 TTGGGTGTTAAGTTTTAACTTTTCCTAAAAGAAAAAATAAAAAATTTTCCTTTCAGCTGTCGTTAGTAGTTTTTATTTGTAATTTTCCTTTAAAATAA  
SA : 101 TTGGGTGTTACGTCTTAGTTTTTCCTAAAACAAAAAATAAAAGTAAATTTTTCCTTTCAGCTGTTGTTAGTAGTTTTCTGTTGTAGT-----  
\* \* \*\* \* \*\* \* \* \* \* \*

WA : 201 CAAAATTTTCTTTTCTCTTATGGGGTTTCGTGTTTGTAGTCATTAACTTTCCTTTAAAATAACAAAATTTTCTCTTCTCTTTTGGTGTTTCGTG  
SA : 194 -----TTTCCTTAAAAATAACAAAAGATTTCCTCTCTTTTATGACGTCCGCT  
\* \* \* \* \* \* \* \* \*

WA : 301 TTAGTAGTTATTAACTTTCCTAGAGTCTGTTTAGGTTTCGTGTTTAGTTTTCTCTCGCGTTCGGCGTCTTAAAGTTTTAACTCTTCTCTAAGCGCTTTTTAAG  
SA : 236 CTGTCATCTTTAATTTTCCTTCGCTCTGTTTAGGTTTGCCTCAAGTTTCTTTGCGTCTTCGTGTTTTAGTTTTAGTTTTCTTAAGTCTTTAAG  
\* \* \* \* \* \* \* \* \* \* \* \* \* \* \* \* \* \*

WA : 401 AGGGTGGTCTCATTTGTCGTGTTGGGTTAATTTAGTTTTTAAAAATTTCCCTTTTAAAAAAGAAAAACGTCAATTTCTTTTATGTCCTTTGTTTTCCGTT  
SA : 336 AGGGTTAGTTCCTTTATCGTGTGGGTAATTTAGATTTTGAATTTTCCTTTTACAAAAGATAGACAACGTCTGTTTTCTTTTATGTCCTGTTTTCCGTT  
\* \* \* \* \* \* \* \* \* \* \* \* \* \* \* \* \* \*

WA : 501 TTTTCGTAGTTTTCCCTTCCACAAAGTTTAAAAATAATTTCTTTTATGTTTTCTTTAGTCTCAGTGTTTAC-----  
SA : 436 TCTTTGTAATTTCCCTTTCGGAATTTAAAAATTTTCTTTTATTTCTTTTATGTTGCAGCATTTTACTTTTTAACTTTTCCTTTAGCGTTTTRGGGGT  
\* \* \* \* \* \* \* \* \* \* \* \* \* \* \* \* \* \*

WA : 567 -----TTTTCTATTTTCCTAAGTAACCTAGGAATTTCTACCTAAGATTCAACTCTTTCTTTTTCTAGTTT  
SA : 536 TTTTCTCTCTGGGGTGTGAGGTTTCTATTTTCCTACGTACCATCTAGGGAGTTTTATCTAAGTTTTAACTCTTTTCTTTTCTAGTTT  
\* \* \* \* \* \* \* \* \* \* \* \* \* \* \* \* \*

WA : 636 TAAAATTTCTGCTGTTTGAAGGAAGTTTGCCCTTCTTCTTCGCTGCTCCTTCGTAACCATTATTTCTATTTCCCTCTCCTTTTAAAGTTTTAAGTTTCG  
SA : 636 TTAATTTTCTGCTGTTTGAAGGAAGTTTGCCCTTCTTCTTTAGTTCCCTTTTAAACCCTTTTAAAGAAATTTCTCTCTCTTCAAGTTTTCAAGTTTCG  
\* \* \* \* \* \* \* \* \* \* \* \* \* \* \* \* \*

WA : 736 CT  
SA : 736 CC  
\* \* \* \* \*

(b)

nt186

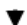

TTTCCTTTAAAATAACAAAATTTTCTTTTCTCTTATTTGGGGTTTCGTGTTTGTAGTCATTAAC  
TTTCCTTTAAAATAACAAAATTTTCTCTTCTCTTTTGGGGTTTCGTGTTTGTAGTTATTAAC  
\* \* \* \* \*

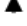

nt251
